# Supplementary material for: Facile preparation of porous palladium nanocubes via a one-pot process induced by 1-hexadecyl-3-methyl imidazolium bromide for methanol electro-oxidation
Source: Royal Society of Chemistry journal article supplement (doi:10.1039/d0nj00130a), 2020-01-01
Supplement: d0nj00130a1.pdf [file d0nj00130a1.pdf]

# Facile Preparation of Porous Palladium Nanocubes via One-pot Process Induced by 1-Hexadecyl-3-methyl Imidazolium Bromide for Methanol Electro-oxidation

Zelin Cui<sup>a</sup>, Xuefeng Bai<sup>a,b,c\*</sup>, Teng Liu<sup>b</sup>

<sup>a</sup> College of Chemistry and Material Science and Chemical Engineering, Harbin Engineering

University, Harbin 150001, China

<sup>b</sup> College of Chemistry and Material Sciences, Heilongjiang University, Harbin 150080, China

<sup>c</sup> Institute of Petrochemistry, Heilongjiang Academy of Sciences, Harbin 150040, China

E-mail: tommybai@126.com

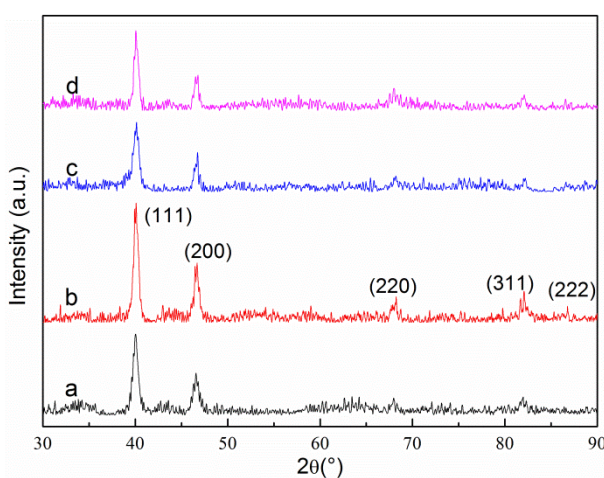

**Figure S1.** XRD patterns of PdPNs synthesized with a HMIB: Pd<sup>2+</sup> molar ratio of (a) 0.1:1; (b) 0.2:1; (c) 0.6:1; (d) 1:1.

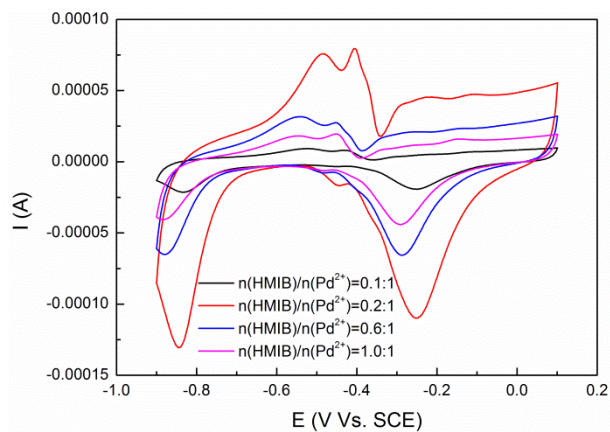

**Figure S2.** CV curves of PdPNs synthesized with different HMIB: Pd<sup>2+</sup> molar ratio in blank 1 M

KOH.

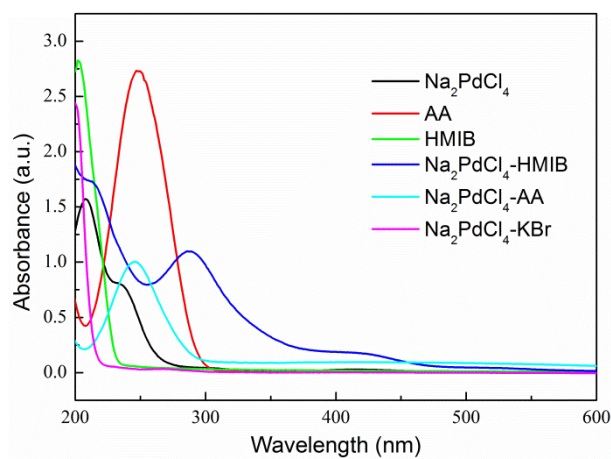

**Figure S3.** UV/Vis absorption spectra of standard solutions.

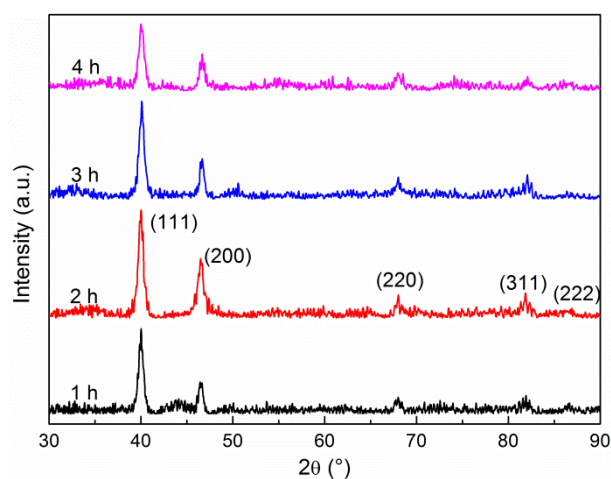

**Figure S4.** XRD patterns of PdPNs synthesized in different reaction time.

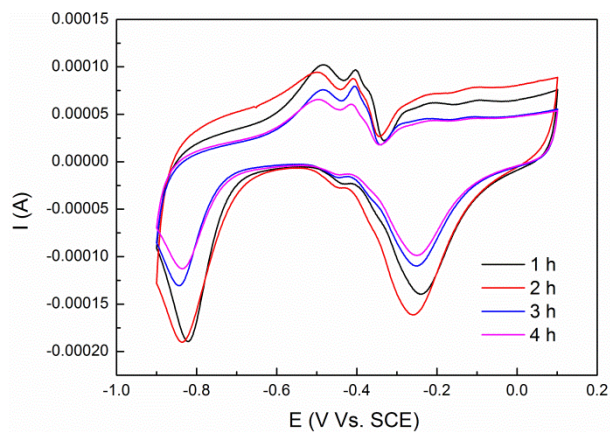

**Figure S5.** CV curves of PdPNs synthesized in different reaction time in blank 1 M KOH.

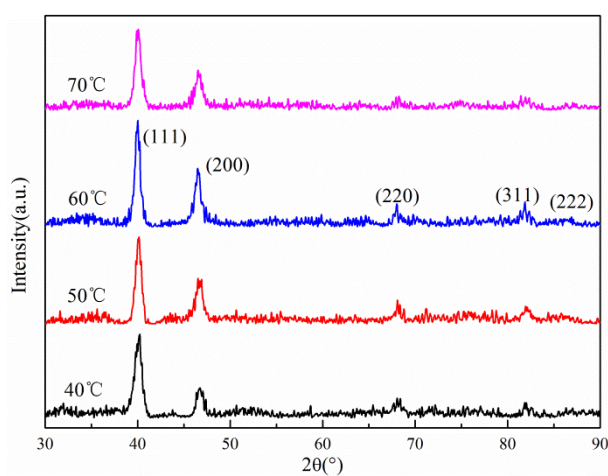

**Figure S6.** XRD patterns of PdPNs synthesized at different reaction temperature.

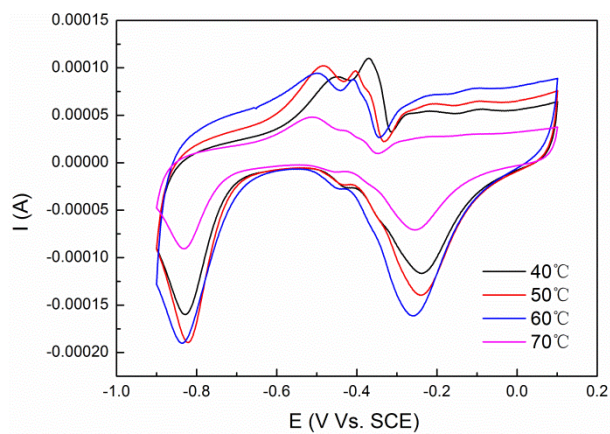

**Figure S7.** CV curves of PdPNs synthesized at different reaction temperature in blank 1 M KOH.
